# Supplementary material for: Wear metal determination in lubricating oils by reversed-phase dispersive liquid–liquid microextraction and microwave induced plasma optical emission spectrometry
Source: Royal Society of Chemistry journal article supplement (doi:10.1039/d3ja00319a), 2023-12-15
Supplement: d3ja00319a1.pdf [file d3ja00319a1.pdf]

Electronic Supplementary Information

## **Wear metals determination in lubricating oils by reversed-phase dispersive liquid-liquid microextraction and microwave induced plasma optical emission spectrometry**

Carmen Sáez<sup>a</sup>, Dimitar Stoitsov<sup>b</sup>, Miguel Ángel Aguirre<sup>c</sup>, Veselin Kmetov<sup>†b</sup>,  
Clara Coscollà<sup>d</sup> and Antonio Canals<sup>c</sup>

<sup>a</sup>Public Health Laboratory of Alicante, 6 Plaza de España, Alicante, 03010, Spain.

<sup>b</sup>Department of Analytical Chemistry and Computer Chemistry, University of Plovdiv Paisii Hilendarski, 24 Tzar Assen Str., Plovdiv, 4000, Bulgaria.

<sup>c</sup>Department of Analytical Chemistry and Food Science, University Institute of Materials, Faculty of Science, University of Alicante, P.O. Box 99, 03080, Alicante, Spain.

<sup>d</sup>Foundation for the Promotion of Health and Biomedical Research in the Valencian Region, FISABIO-Public Health, 21, Avenida Catalunya, Valencia, 46020, Spain.

<sup>†</sup> Deceased.

\*Corresponding authors: [aguirre.pastor@ua.es](mailto:aguirre.pastor@ua.es) (M.A. Aguirre) and [a.canals@ua.es](mailto:a.canals@ua.es) (A. Canals)

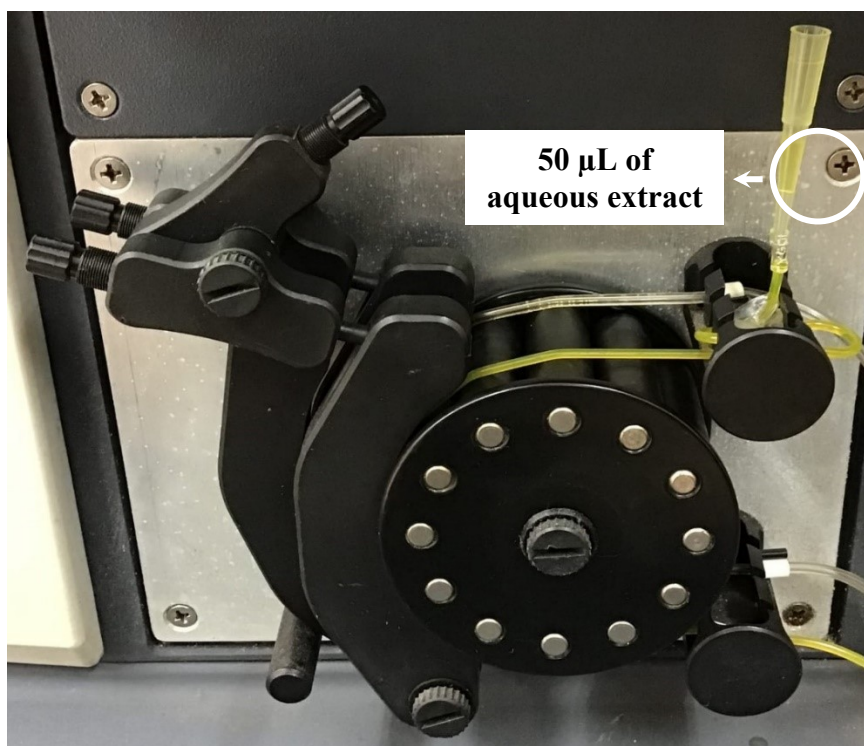

**Figure S1.** Photograph of part of the sample introduction system for the introduction of low volume of aqueous extract.

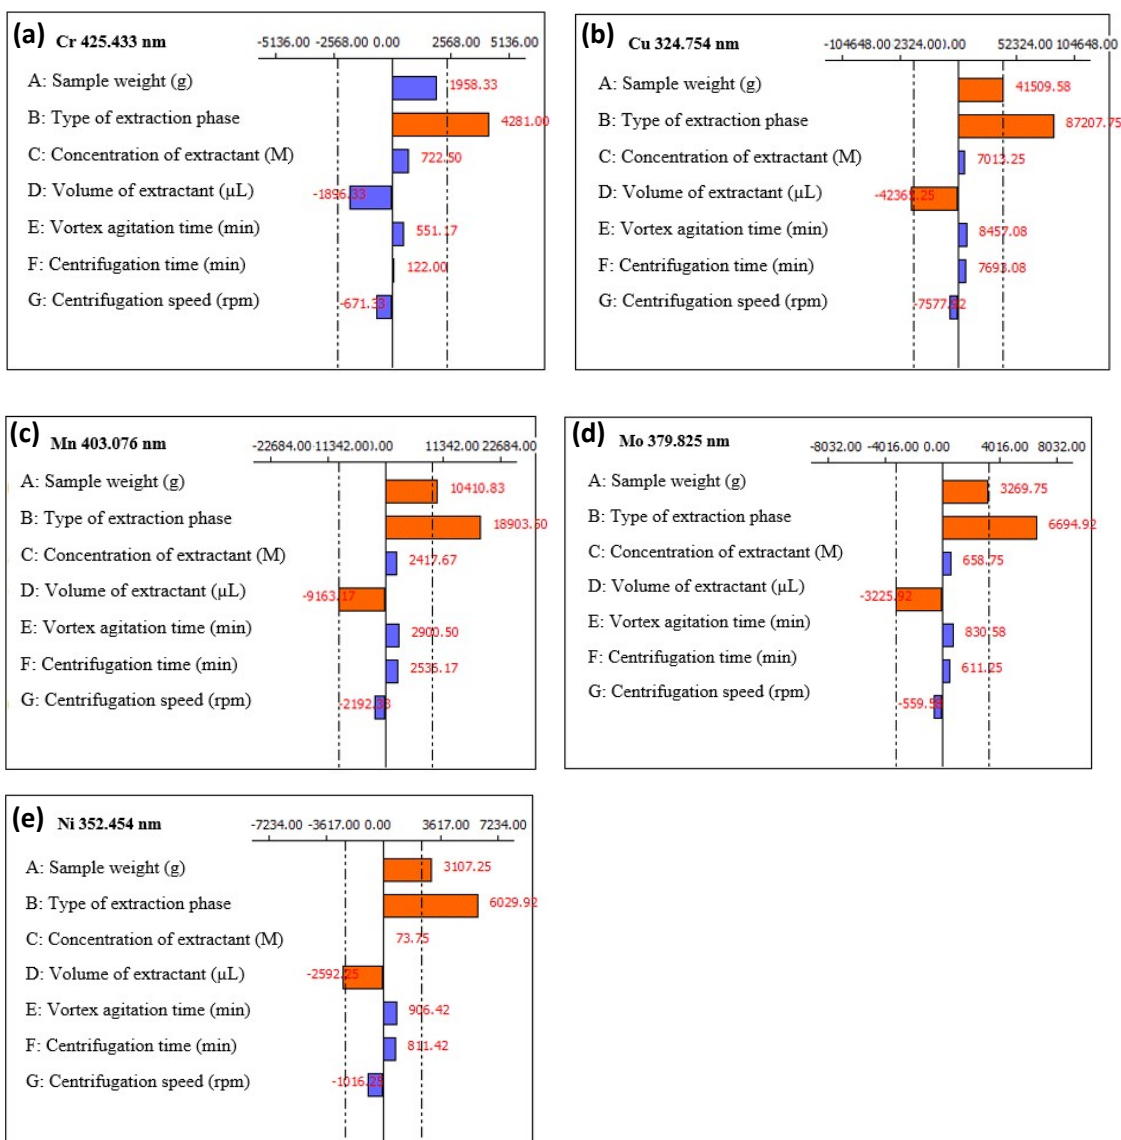

**Figure S2.** Pareto charts of the Plackett-Burman design obtained for: **(a)** Cr; **(b)** Cu; **(c)** Mn; **(d)** Mo and **(e)** Ni.

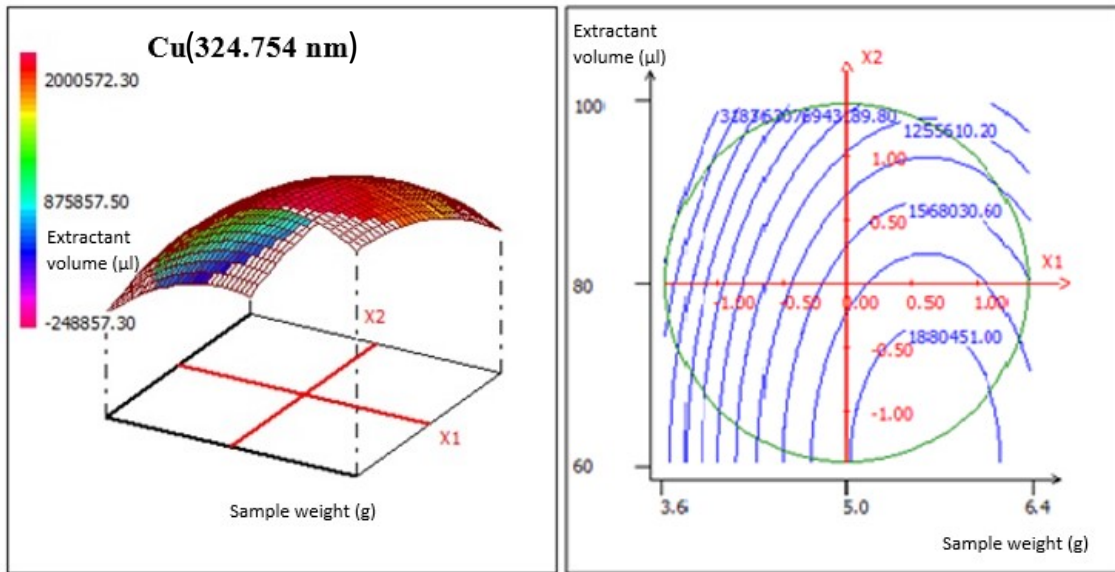

**Figure S3.** Response surface and contour plots from circumscribed central composite design for Cu.

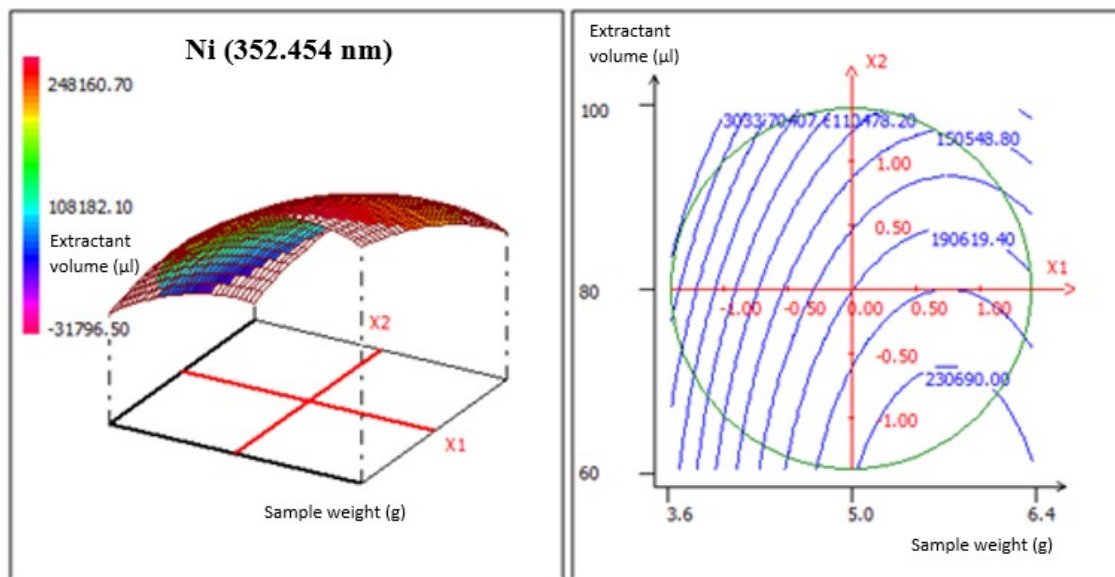

**Figure S4.** Response surface and contour plots from circumscribed central composite design for Ni.

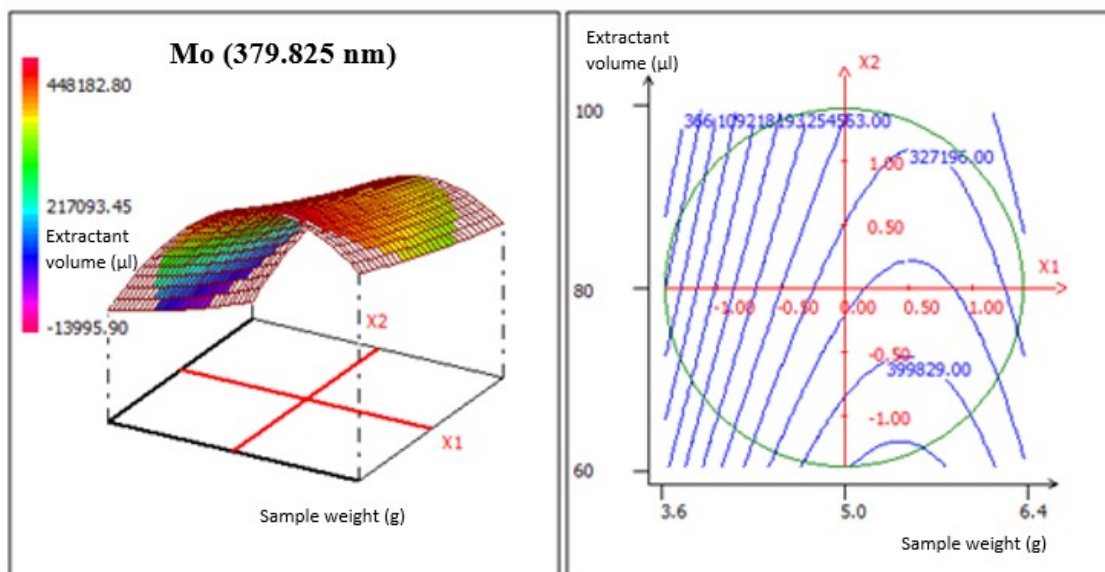

**Figure S5.** Response surface and contour plots from circumscribed central composite design for Mo.

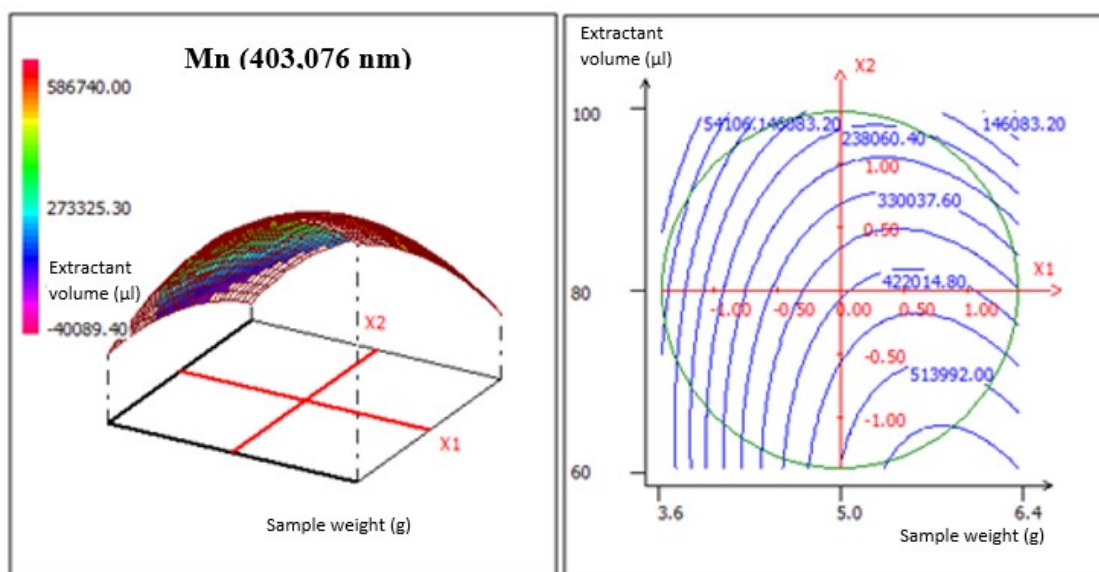

**Figure S6.** Response surface and contour plots from circumscribed central composite design for Mn.

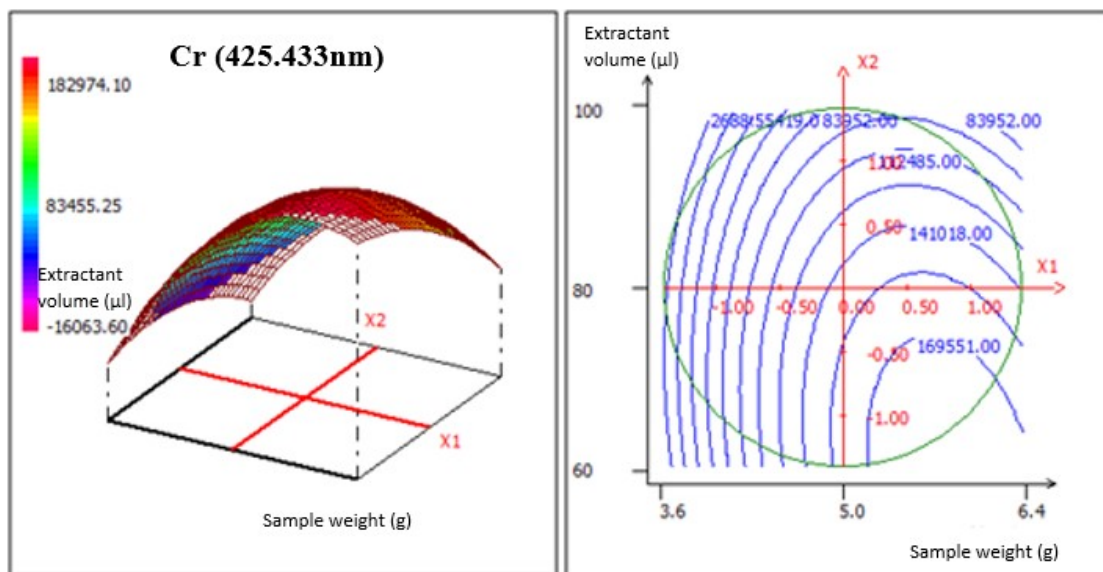

**Figure S7.** Response surface and contour plots from circumscribed central composite design for Cr.

**Table S1.** Factors and levels of the Plackett-Burman design.

| Experimental factor                | Low level<br>(-1) | High level (+1) |
|------------------------------------|-------------------|-----------------|
| A: Sample weight (g)               | 3                 | 7               |
| B: Type of extraction phase        | HNO <sub>3</sub>  | HCl             |
| C: Concentration of extractant (M) | 0                 | 3               |
| D: Volume of extractant (μL)       | 60                | 100             |
| E: Vortex agitation time (min)     | 1                 | 3               |
| F: Centrifugation time (min)       | 1                 | 3               |
| G: Centrifugation speed (rpm)      | 2000              | 3000            |

**Table S2.** Screening study matrix of the Plackett-Burman design.

| Experiment | A | B                | C | D   | E | F | G    |
|------------|---|------------------|---|-----|---|---|------|
| 1          | 7 | HCl              | 0 | 100 | 3 | 3 | 2000 |
| 2          | 3 | HCl              | 3 | 60  | 3 | 3 | 3000 |
| 3          | 7 | HNO <sub>3</sub> | 3 | 100 | 1 | 3 | 3000 |
| 4          | 3 | HCl              | 0 | 100 | 3 | 1 | 3000 |
| 5          | 3 | HNO <sub>3</sub> | 3 | 60  | 3 | 3 | 2000 |
| 6          | 3 | HNO <sub>3</sub> | 0 | 100 | 1 | 3 | 3000 |
| 7          | 7 | HNO <sub>3</sub> | 0 | 60  | 3 | 1 | 3000 |
| 8          | 7 | HCl              | 0 | 60  | 1 | 3 | 2000 |
| 9          | 7 | HCl              | 3 | 60  | 1 | 1 | 3000 |
| 10         | 3 | HCl              | 3 | 100 | 1 | 1 | 2000 |
| 11         | 7 | HNO <sub>3</sub> | 3 | 100 | 3 | 1 | 2000 |
| 12         | 3 | HNO <sub>3</sub> | 0 | 60  | 1 | 1 | 2000 |

**Table S3.** Factors and levels of the CCCD.

| Factors                | Level       |                |              | Star points<br>( $\alpha=1,414$ ) |            |
|------------------------|-------------|----------------|--------------|-----------------------------------|------------|
|                        | Low<br>(-1) | Central<br>(0) | High<br>(+1) | - $\alpha$                        | + $\alpha$ |
| Sample weight (g)      | 4,0         | 5,0            | 6,0          | 3,6                               | 6,4        |
| Extractant volume (μl) | 66          | 80             | 94           | 60                                | 100        |

**Table S4.** Optimization study matrix of the CCD.

| Experiment | Sample weight (g) | Extractant volume ( $\mu\text{L}$ ) |
|------------|-------------------|-------------------------------------|
| 1          | 4.0               | 66                                  |
| 2          | 6.0               | 66                                  |
| 3          | 4.0               | 94                                  |
| 4          | 6.0               | 94                                  |
| 5          | 3.6               | 80                                  |
| 6          | 6.4               | 80                                  |
| 7          | 5.0               | 60                                  |
| 8          | 5.0               | 100                                 |
| 9          | 5.0               | 80                                  |
| 10         | 5.0               | 80                                  |
| 11         | 5.0               | 80                                  |
| 12         | 5.0               | 80                                  |

**Table S5.** Optimal values for Cu, Ni, Mo, Mn and Cr.

| Analyte | Sample weight (g) | Extractant volume ( $\mu\text{L}$ ) |
|---------|-------------------|-------------------------------------|
| Cr      | 5,8               | 60                                  |
| Cu      | 5,6               | 60                                  |
| Mn      | 6,2               | 60                                  |
| Mo      | 5,8               | 60                                  |
| Ni      | 5,7               | 60                                  |



**Table S6.** Penalty points (PP) calculated to assess the greenness of the proposed method for Cr, Cu, Mn, Mo, and Ni determination in lubricating oils.

|                                                   | Penalty Points (PP)          |
|---------------------------------------------------|------------------------------|
|                                                   | <b>Amount PP x Hazard PP</b> |
| <b>Reagents (Chemical Hazard)</b>                 |                              |
| Hydrochloric Acid (37%)                           | 4                            |
| Petroleum ether as solvent:                       | 8                            |
| Conostan S-21:                                    | 1                            |
| <b>Instruments (energy consumed by equipment)</b> |                              |
| Vortex stirring (3min)                            | 0                            |
| Centrifugation (3 min)                            | 0                            |
| MIP OES analysis                                  | 1                            |
| <b>Waste</b>                                      | <b>8</b>                     |
| <hr/>                                             |                              |
| <b>Analytical Eco-Scale Total Score</b>           |                              |
| <b>100- 22 = 78</b>                               |                              |
| <hr/>                                             |                              |
